# Supplementary material for: Utilization of magnification devices in Vietnam’s dental practice and education: an online survey
Source: Springer Nature journal article supplement (doi:10.1186/s12903-025-06306-6), 2025-06-06
Supplement: MOESM1 [file 12903_2025_6306_MOESM1_ESM.pdf]

## **Section 1: Participant Information**

### **1. Workplace (select all that apply)**

- Specialized Dental Hospital
- Dentistry Department of a General Hospital
- Dental Training Institutions
- Private Dental Clinic
- Other (please specify)

### **2. Gender**

- Male
- Female

### **3. Workplace Locations**

(Please list all workplaces selected in Question 1)

### **4. Age**

- <30 years old
- 30-35 years old
- 36-40 years old
- 41-45 years old
- 46-50 years old
- 50 years old

### **5. Educational Qualification (Select all that apply)**

- Undergraduate Student
- Dentist
- Master's Degree
- Resident Doctor
- Specialist Level I
- Specialist Level II
- PhD
- Other (please specify)

**6. Have you ever used or heard of the following magnification devices in dentistry?** (Select all that apply)

- Loupes
- Operating Microscope
- 3D Microscope
- Never used or heard of
- Other (please specify)

**7. How did you learn about the application of magnification devices in dentistry?** (Select all that apply)

- Undergraduate training
- Postgraduate training
- Conferences/Workshops
- Colleagues/Friends
- Media/Social Networks
- Other (please specify)

**8. In your opinion, which dental specialties can benefit from magnification devices?** (Select all that apply)

- Disease diagnosis
- Implantology
- Tooth extractions
- Oral surgery
- Restorative dentistry
- Endodontics
- Fixed prosthodontics (including implant prosthetics)
- Removable prosthodontics (including implant prosthetics)
- Orthodontics
- Other (please specify)

**9. Please assess your knowledge of magnification devices:**

### Level Description

- 1 Little or no knowledge
- 2 Basic knowledge: Know basic features but not how to use/adjust
- 3 Moderate knowledge: Can use and adjust devices at a basic level
- 4 Good knowledge: Can use and fully adjust devices proficiently, fix minor issues
- 5 Expert knowledge: Understand operational principles, use devices fluently, and can fix most issues given the right tools

### Self-assessment for each device:

- Loupes
- Operating Microscope
- 3D Microscope
- Other Magnification Devices

### 10. How did you learn to use magnification devices?

| Device Type          | No knowledge | Self-study | Peer-learning | Suppliers' experts | Universities' experts |
|----------------------|--------------|------------|---------------|--------------------|-----------------------|
| Loupes               |              |            |               |                    |                       |
| Operating Microscope |              |            |               |                    |                       |
| 3D Microscope        |              |            |               |                    |                       |
| Other                |              |            |               |                    |                       |

### 11. Have you ever used magnification devices in dentistry?

- Never used
- Have used before
- Other (please specify)

---

## Sections 2-4: Experience with Specific Magnification Devices

### Section 2:

### 12. Experience and Knowledge about Loupes

- Have you ever used loupes in dentistry? (Yes/No)

**13. Years of experience using loupes**

- ☐ <1 year
- ☐ 1-5 years
- ☐ 5-10 years
- ☐ 10 years

**14. Purpose of use** (Select all that apply)

- ☐ Teaching
- ☐ Research
- ☐ Diagnosis
- ☐ Treatment
- ☐ Other

**15. Frequency of use for specific dental procedures**

**On a 5-point scale:**

**1: Never**

**2: Rarely (<2 times/week)**

**3: Occasionally (2-5 times/week)**

**4: Frequently (6-10 times/week)**

**5: Very frequently (>10 times/week)**

- ☐ Diagnosis
- ☐ Implantology
- ☐ Tooth extraction
- ☐ Oral surgery
- ☐ Tooth fillings
- ☐ Endodontics
- ☐ Fixed restoration (including restorations on implants)
- ☐ Removable restorations
- ☐ Orthodontics
- ☐ Others

**16. Use of Loupes in Endodontics**

- ☐ Have you used loupes for: (select all that apply)
  - ☐ Canal orifice location
  - ☐ Managing broken instruments
  - ☐ Handling perforations/ledges
  - ☐ Obturation and filling placement

- Removing old filling materials

### **Section 3: Experience with Operating Microscopes**

#### **Experience and Knowledge about DOM**

- Have you ever used DOM in dentistry? (Yes/No)

#### **17. Years of experience using DOM**

- <1 year
- 1-5 years
- 5-10 years
- 10 years

#### **18. Purpose of use** (Select all that apply)

- Teaching
- Research
- Diagnosis
- Treatment
- Other

#### **19. Frequency of use for specific dental procedures**

**On a 5-point scale:**

**1: Never**

**2: Rarely (<2 times/week)**

**3: Occasionally (2-5 times/week)**

**4: Frequently (6-10 times/week)**

**5: Very frequently (>10 times/week)**

- Diagnosis
- Implantology
- Tooth extraction
- Oral surgery
- Tooth fillings
- Endodontics
- Fixed restoration (including restorations on implants)
- Removable restorations
- Orthodontics
- Others

#### **20. Use of DOM in Endodontics**

- Have you used DOM for: (select all that apply)

- Canal orifice location
- Managing broken instruments
- Handling perforations/ledges
- Obturation and filling placement
- Removing old filling materials

#### **Section 4: Experience with 3D Microscopes**

##### **Experience and Knowledge about 3D DOM**

- Have you ever used 3D DOM in dentistry? (Yes/No)

##### **21. Years of experience using 3D DOM**

- <1 year
- 1-5 years
- 5-10 years
- 10 years

##### **22. Purpose of use** (Select all that apply)

- Teaching
- Research
- Diagnosis
- Treatment
- Other

##### **23. Frequency of use for specific dental procedures**

**On a 5-point scale:**

**1: Never**

**2: Rarely (<2 times/week)**

**3: Occasionally (2-5 times/week)**

**4: Frequently (6-10 times/week)**

**5: Very frequently (>10 times/week)**

- Diagnosis
- Implantology
- Tooth extraction
- Oral surgery
- Tooth fillings
- Endodontics
- Fixed restoration (including restorations on implants)

- Removable restorations
- Orthodontics
- Others

#### **24. Use of 3D DOM in Endodontics**

- Have you used 3D DOM for: (select all that apply)
  - Canal orifice location
  - Managing broken instruments
  - Handling perforations/ledges
  - Obturation and filling placement
  - Removing old filling materials

---

### **Section 5: Accessibility and Effectiveness of Magnification Devices**

**25.** Doctors are asked to rate statements on a scale from **0 (Strongly Disagree)** to **5 (Strongly Agree)** regarding:

- Satisfaction with loupes/microscopes/3D microscopes
- Necessity of these devices in improving treatment quality

#### **Evaluation of Magnification Devices in Different Specialties:**

**26.** Participants rate **necessity** on a scale from 1 (Not Necessary) to 5 (Very Necessary) in different specialties:

- Diagnosis
- Implantology
- Tooth extraction
- Oral surgery
- Tooth fillings
- Endodontics
- Fixed restoration (including restorations on implants)
- Removable restorations
- Orthodontics
- Others

#### **27. Limitations of Magnification Devices:** (Check all that apply)

- High cost
- Heavy on the head
- Eye strain

- Uncomfortable posture
- Difficult to operate
- Blurred or double images
- Difficult maintenance
- Bulky design
- Prolonged treatment time
- Complicated to use
- No significant limitations

**28. Advantages of Magnification Devices:** (Check all that apply)

- Enhanced visualization
- Precision in operation
- Improved ergonomics
- Treatment with small instruments
- Reasonable cost
- Infection control
- No significant advantages

**29. Future Plans for Using Magnification Devices** (Check all that apply)

- Loupes
- Operating Microscope
- 3D Microscope
- No intention to use
